# Supplementary material
Source: PubMed Central journal article supplement (PMC7453907)
Supplement: jciinsight-5-140327-s102.pdf [file jciinsight-5-140327-s102.pdf]

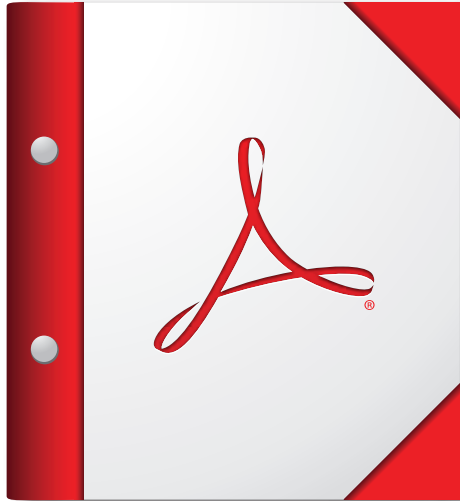

**For the best experience, open this PDF portfolio in  
Acrobat X or Adobe Reader X, or later.**

[Get Adobe Reader Now!](#)
